# Supplementary material for: Ethylene mediates CuO NP-induced ultrastructural changes and oxidative stress inArabidopsis thalianaleaves
Source: Royal Society of Chemistry journal article supplement (doi:10.1039/c9en01302d), 2020-01-01

**Ethylene mediates CuO NP-induced ultrastructural changes and oxidative stress in  
*Arabidopsis thaliana* leaves**

Wardah Azhar<sup>a+</sup>, Ali Raza Khan<sup>a+</sup>, Noor Muhammad<sup>b</sup>, Bohan Liu<sup>a</sup>, Ge Song<sup>a</sup>, Akhlaq Hussain<sup>c</sup>,  
Muhammad Umair Yasin<sup>a</sup>, Sulaiman Khan<sup>a</sup>, Raheel Munir, Yinbo Gan<sup>a\*</sup>

<sup>a</sup>Zhejiang Key Lab of Crop Germplasm, Department of Agronomy, College of Agriculture and  
Biotechnology, Zhejiang University, Hangzhou, China

<sup>b</sup>Central Cotton Research Institute, Multan, Pakistan

<sup>c</sup>School of Materials Science and Engineering, Zhejiang University, Hangzhou 310027, China

\*Corresponding author

Email: [ygan@zju.edu.cn](mailto:ygan@zju.edu.cn)

Telephone: 0086 517 88982204

Fax: 0086 517 88982204

+ These authors contributed equally to this work

**Table S1. List of primers used in this study**

| <b>Name of the gene</b> | <b>Forward Primers</b>      | <b>Reverse Primers</b>    |
|-------------------------|-----------------------------|---------------------------|
| <i>ACTIN2</i>           | GGTATCGCTGACCGTATGAG        | ATCTGCTGGAATGTGCTGAG      |
| <i>MSD</i>              | AACACCACCAGACTTATGT         | GCCGTTGAACTTGATGAG        |
| <i>APX1</i>             | GTATCCACATTGCTCTTAGG        | GCCACCAGTAACTTCAAC        |
| <i>CAT2</i>             | GAGAGGCAAGAACGATTC          | AACGAGACAATGACAGTAA       |
| <i>CAT3</i>             | CCCATTCTACACCACAAAC         | ACCCTTAGCACTGATTCC        |
| <i>GPX4</i>             | TTACACCGCTATCAATCG          | AACAGCAACCTACTCTTC        |
| <i>GRI</i>              | TCCTCCTCTCCGTATCTG          | CCGCCACCTTATCAATCT        |
| <i>DHAR1</i>            | GGTTGCTCTTGGTCATTAC         | TTCTTAGCCTTGGTGTTCT       |
| <i>FER1</i>             | TCGTCTCACCTATCTCAG          | TTGCTTCAATCTGCTCTC        |
| <i>ETR1</i>             | CTCCTTCTCCGTCGCTCTC         | CCTCTCTCACACATACACACAC    |
| <i>EIN2</i>             | CGTTCTCAACCGCCTACAG         | CGGACTCGCTCTCTGGTG        |
| <i>EIN3</i>             | GCCAGGAGTAGTAGGAACG         | CATAACAAGCGATAGAGACAGAG   |
| <i>ACS2</i>             | TCATGGGAAAAGCTAGAGGTGGAAG   | TCAACGGTTAATTTGAAATTGTCGG |
| <i>ACS6</i>             | AAACCGATGGCTGCAACAACCTATGAT | TAAGTCTGTGCACGGACTAGCGGAG |
| <i>ACS8</i>             | TGGGGTGATTTACTCCAACGATGATT  | GACTCTCGATGCCTGCAGCCTCTAG |

**Table. S2 Hydrodynamic size (nm) of CuO NPs**

| <b>Different Concentrations<br/>of CuO NPs in DI water</b> | <b>Hydrodynamic Size (nm)</b> |
|------------------------------------------------------------|-------------------------------|
| 50 mg/L                                                    | 380 ± 9.5                     |
| 100 mg/L                                                   | 325.9 ± 22.13                 |
| 200 mg/L                                                   | 397.8 ± 28.2                  |
| 300 mg/L                                                   | 285.06 ± 13.02                |
| 400 mg/L                                                   | 735.53 ± 35.03                |

Fig. S1. XRD characterization of CuO NPs

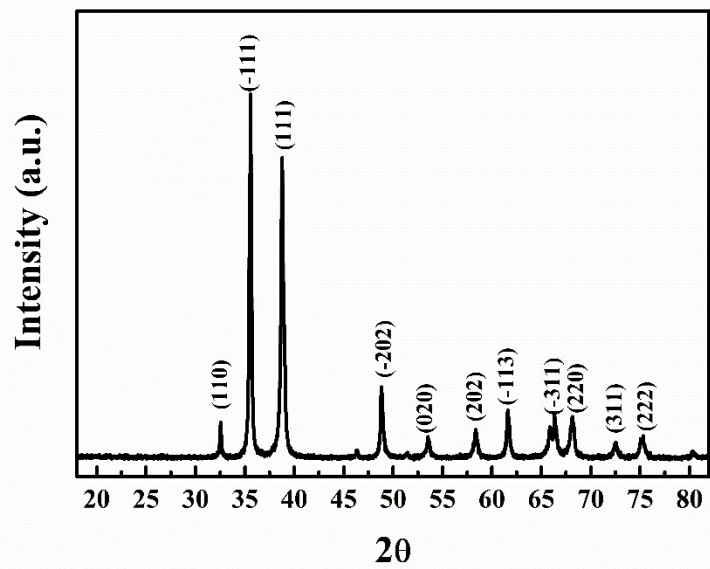

Supplement: c9en01302d1.pdf [file c9en01302d1.pdf]
